# Supplementary material for: Effect of myocyte-fibroblast coupling on the onset of pathological dynamics in a model of ventricular tissue
Source: PubMed Central journal article supplement (PMC5247688; doi:10.1038/srep40985), 2017-01-20
Supplement: srep40985-s1.pdf [file srep40985-s1.pdf]

## SUPPLEMENTARY MATERIAL FOR

Effect of myocyte-fibroblast coupling on the onset of pathological dynamics in a model of ventricular tissue.

S. Sridhar, N. Vandersickel and A. V. Panfilov

### Contents

1. Fig S1: Fibroblasts are inserted randomly between myocytes on a system of size  $1024 \times 1024$ . 10 percent of the lattice points are occupied by fibroblasts (black squares) while the remaining points are occupied by myocytes. (b) Schematic diagram illustrating diffuse fibrosis with a lattice of myocytes (circles) interspersed with fibroblasts (ellipses) coupled to the each other via gap-junctions (broken lines).
2. Fig S2: The effect of coupling with Fibroblast-1 (a) and Fibroblast-2(b) on a single cell action potential for  $xG_{CaL} = 5.0$  and  $yG_{Kr} = 0.4$  for the case of no coupling (solid line),  $G_s = 0.5$  nS (broken line) and  $G_s = 2.0$  (dot-dash line).
3. Fig S3: Phase diagram for the different forms of action potentials in the  $xG_{CaL}$ - $yG_{Kr}$  parameter space for the case of one myocyte coupled to 5 fibroblasts as a function of strength of M-F coupling ( $G_s$ ), with  $x$  and  $y$  corresponding to the factor by which the maximal conductance of  $I_{Kr}$  and  $I_{CaL}$  are multiplied. The top row (a-c) correspond to the case with fibroblast parameters ( $V_{FR} = -49.7$  mV and  $C = 6.3$  pF) while the bottom row (d-f) corresponds to the case with parameters ( $V_{FR} = -24.5$  mV and  $C = 50$  pF). Cases that do not describe any reversal of the action potential before complete repolarization are represented as NO EAD, while those that show such a reversal are denoted EAD. OSC corresponds to action potentials that oscillate without returning to their resting state.
4. Fig S4: Fraction of simulations leading to the different dynamical states observed in Fig.5 for both Fibroblast-1 (a) and Fibroblast-2 (b) are shown as a function of the M-F coupling strength ( $G_s$ ). For ease of comparison the results for the case without fibroblasts is also plotted.
5. Fig S5: Fraction of simulations leading to the different dynamical states observed in Fig.6 for both Fibroblast-1 (a) and Fibroblast-2 (b) are shown as a function of the M-F coupling strength ( $G_s$ ). For the sake of comparison the results for the case without fibroblasts is also plotted.
6. Fig S6: The value of parameter  $xG_{CaL}$  at which the transition from NO EAD to EAD state occurs is plotted as a function of the strength of M-F coupling for values of  $yG_{Kr} = 0.4$  (a, d), 0.8 (b, e) and 1.2 (c, f) respectively for the case  $C = 6.3$  pF (circle),  $C = 14.5$  pF (diamond) and  $C = 50$  pF (square). Panels (a, b, c) correspond to resting membrane potential  $V_{FR} = 49.7$  mV, while panels (d, e, f) correspond to the case when  $V_{FR} = 24.5$  mV.

7. Fig S7: Illustration of the effect of MF coupling on action potentials of myocyte (a) and fibroblast (b), current flowing from a myocyte to ( $N = 5$ ) coupled fibroblasts  $I_{MtoF}$  (c) and myocyte L-type calcium current (d) for the cases of MF coupling to zero fibroblast (solid line), 5 fibroblasts with  $V_{FR} = -49.7mV$  (broken line) and  $V_{FR} = -24.5mV$  (dot-dash line). Fibroblast capacitance  $C_F = 50$  pF and strength of MF coupling is  $G_s = 1nS$ . The current flowing between myocyte and fibroblasts is  $I_{MtoF} = -N \times \frac{G_s}{C_m} \times (V_{Myo} - V_F)$ , where  $V_{Myo}$  and  $V_F$  are myocyte and fibroblast voltages respectively and  $C_m = 185$  pF is the myocyte membrane capacitance. For the parameters used here ( $xG_{CaL} = 2.0$  and  $yG_{Kr} = 0.4$ ) while no EADs are observed even in the presence of coupling, depending on the value of  $V_{FR}$  the myocyte action potential duration either shortens (broken line) or lengthens (dot-dash line).
8. Fig S8: Illustration of the effect of MF coupling on action potentials of myocyte and fibroblast (a), myocyte L-type calcium current (b) and the current flowing from a myocyte to ( $N = 5$ ) coupled fibroblasts  $I_{MtoF}$  (c) for the cases of MF coupling with zero fibroblast (solid line), 5 fibroblasts with  $V_{FR} = -49.7mV$  (broken line) and  $V_{FR} = -24.5mV$  (dot-dash line). Fibroblast capacitance  $C_F = 50$  pF and strength of MF coupling is  $G_s = 1nS$ . The current flowing between myocyte and fibroblasts is  $I_{MtoF} = -N \times \frac{G_s}{C_m} \times (V_{Myo} - V_F)$ , where  $V_{Myo}$  and  $V_F$  are myocyte and fibroblast voltages respectively and  $C_m = 185$  pF is the myocyte membrane capacitance. For the parameters used here ( $xG_{CaL} = 3.0$  and  $yG_{Kr} = 0.4$ ), EAD occurs only in the presence of MF coupling (broken line).

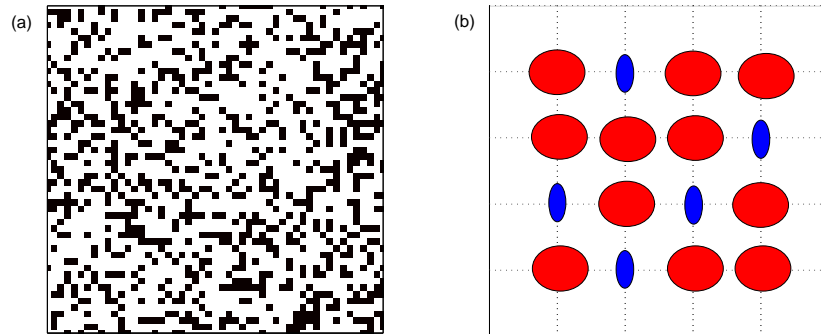

Figure 1: (a) Fibroblasts are inserted randomly between myocytes on a system of size  $1024 \times 1024$ . 10 percent of the lattice points are occupied by fibroblasts (black squares) while the remaining points are occupied by myocytes. (b) Schematic diagram illustrating diffuse fibrosis with a lattice of myocytes (circles) interspersed with fibroblasts (ellipses) coupled to each other via gap-junctions (broken lines).

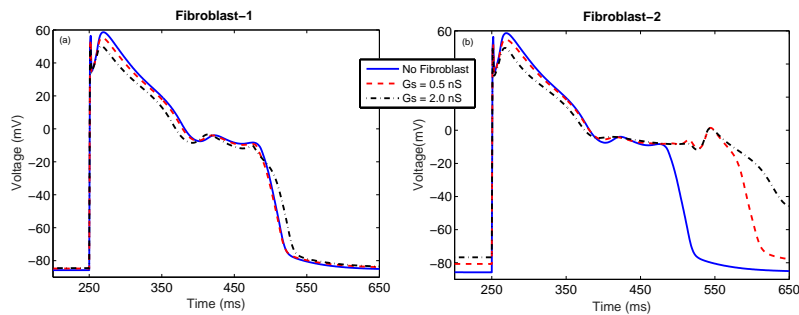

Figure 2: The effect of coupling with Fibroblast-1 (a) and Fibroblast-2 (b) on a single cell action potential for  $xG_{CaL} = 5.0$  and  $yG_{Kr} = 0.4$  for the case of no coupling (solid line),  $G_s = 0.5$  nS (broken line) and  $G_s = 2.0$  (dot-dash line).

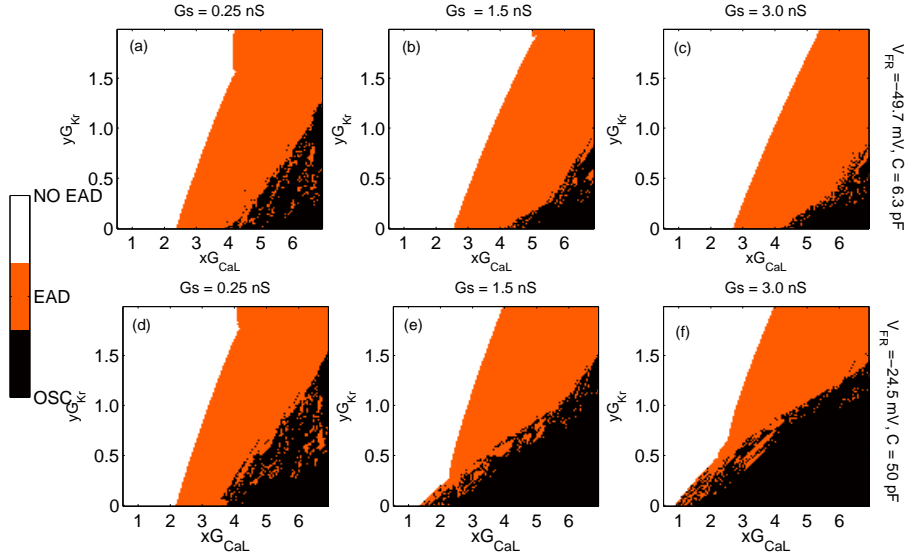

Figure 3: Phase diagram for the different forms of action potentials in the  $xG_{CaL}$ - $yG_{K_r}$  parameter space for the case of one myocyte coupled to 5 fibroblasts as a function of strength of M-F coupling ( $G_s$ ), with  $x$  and  $y$  corresponding to the factor by which the maximal conductance of  $I_{K_r}$  and  $I_{CaL}$  are multiplied. The top row (a-c) correspond to the case with fibroblast parameters ( $V_{FR} = -49.7$  mV and  $C = 6.3$  pF) while the bottom row (d-f) corresponds to the case with parameters ( $V_{FR} = -24.5$  mV and  $C = 50$  pF). Cases that do not describe any reversal of the action potential before complete repolarization are represented as NO EAD, while those that show such a reversal are denoted EAD. OSC corresponds to action potentials that oscillate without returning to their resting state.

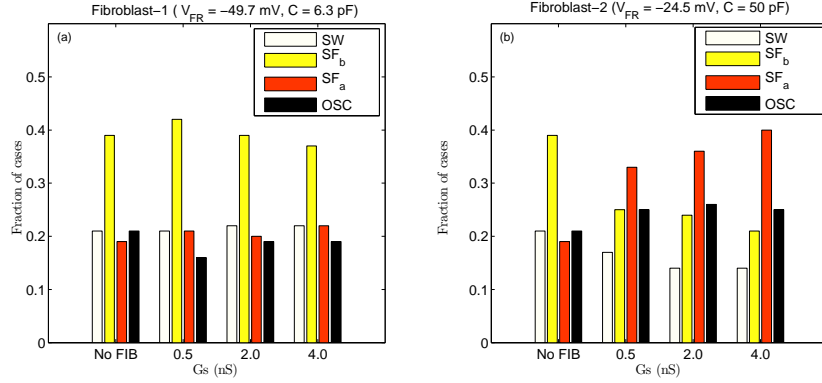

Figure 4: Fraction of simulations leading to the different dynamical states observed in Fig.5 for both Fibroblast-1 (a) and Fibroblast-2 (b) are shown as a function of the M-F coupling strength ( $G_s$ ). For ease of comparison the results for the case without fibroblasts is also plotted.

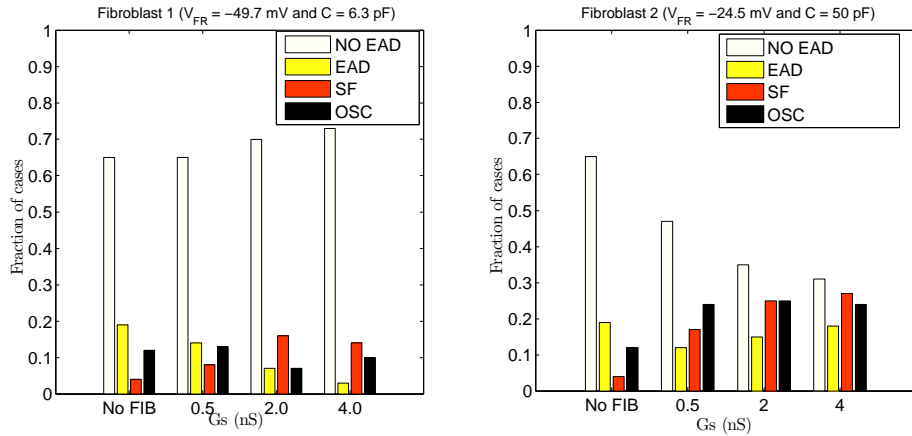

Figure 5: Fraction of simulations leading to the different dynamical states observed in Fig.6 for both Fibroblast-1 (a) and Fibroblast-2 (b) are shown as a function of the M-F coupling strength ( $G_s$ ). For the sake of comparison the results for the case without fibroblasts is also plotted.

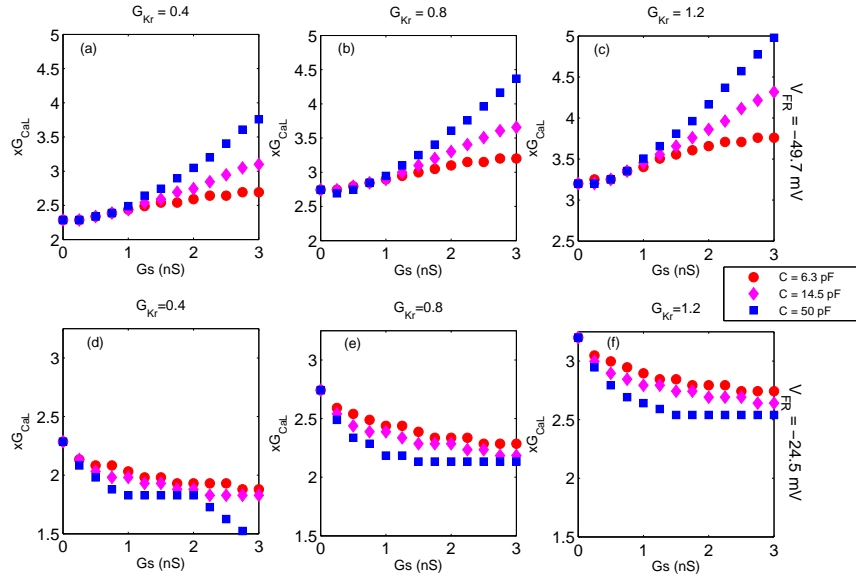

Figure 6: The value of parameter  $xG_{CaL}$  at which the transition from NO EAD to EAD state occurs is plotted as a function of the strength of M-F coupling for values of  $yG_{Kr} = 0.4$  (a, d), 0.8 (b, e) and 1.2 (c, f) respectively for the case  $C = 6.3$  pF (circle),  $C = 14.5$  pF (diamond) and  $C = 50$  pF (square). Panels (a, b, c) correspond to resting membrane potential  $V_{FR} = 49.7$  mV, while panels (d, e, f) correspond to the case when  $V_{FR} = 24.5$  mV.

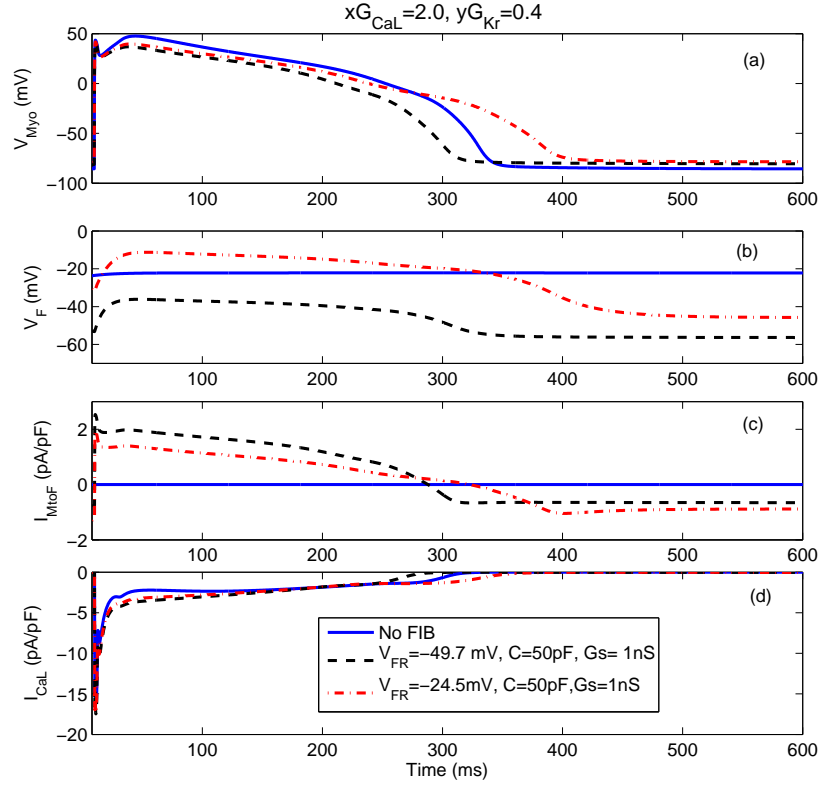

Figure 7: Illustration of the effect of MF coupling on action potentials of myocyte (a) and fibroblast (b), current flowing from a myocyte to ( $N = 5$ ) coupled fibroblasts  $I_{MtoF}$  (c) and myocyte L-type calcium current (d) for the cases of MF coupling to zero fibroblast (solid line), 5 fibroblasts with  $V_{FR} = -49.7mV$  (broken line) and  $V_{FR} = -24.5mV$  (dot-dash line). Fibroblast capacitance  $C_F = 50$  pF and strength of MF coupling is  $G_s = 1nS$ . The current flowing between myocyte and fibroblasts is  $I_{MtoF} = -N \times \frac{G_s}{C_m} \times (V_{Myo} - V_F)$ , where  $V_{Myo}$  and  $V_F$  are myocyte and fibroblast voltages respectively and  $C_m = 185$  pF is the myocyte membrane capacitance. For the parameters used here ( $xG_{CaL} = 2.0$  and  $yG_{Kr} = 0.4$ ) while no EADs are observed even in the presence of coupling, depending on the value of  $V_{FR}$  the myocyte action potential duration either shortens (broken line) or lengthens (dot-dash line).

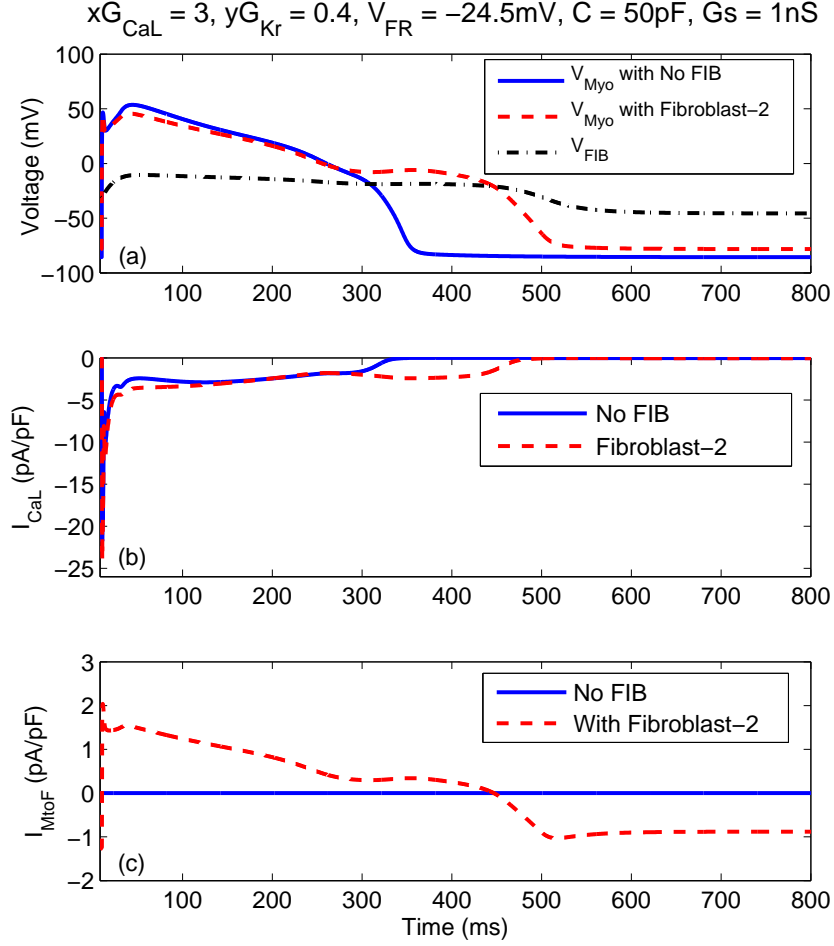

Figure 8: Illustration of the effect of MF coupling on action potentials of myocyte and fibroblast (a), myocyte L-type calcium current (b) and the current flowing from a myocyte to ( $N = 5$ ) coupled fibroblasts  $I_{MtoF}$  (c) for the cases of MF coupling with zero fibroblast (solid line), 5 fibroblasts with  $V_{FR} = -49.7mV$  (broken line) and  $V_{FR} = -24.5mV$  (dot-dash line). Fibroblast capacitance  $C_F = 50$  pF and strength of MF coupling is  $Gs = 1nS$ . The current flowing between myocyte and fibroblasts is  $I_{MtoF} = -N \times \frac{G_s}{C_m} \times (V_{Myo} - V_F)$ , where  $V_{Myo}$  and  $V_F$  are myocyte and fibroblast voltages respectively and  $C_m = 185$  pF is the myocyte membrane capacitance. For the parameters used here ( $xG_{CaL} = 3.0$  and  $yG_{Kr} = 0.4$ ), EAD occurs only in the presence of MF coupling (broken line).
